# Supplementary material for: Transforming healthcare: A pilot study to improve primary healthcare professionals’ self- management support behaviour through blended learning
Source: Research Square preprint supplement (doi:10.21203/rs.3.rs-3792014/v1), 2023-12-28
Supplement: Supplementary file [file 744c712c6db50d24627fea2e.pdf]

## Appendices

### Supplementary file A

| No.  | Reporting Item (Not all items apply to all study designs.)                                                                                                                                                                             | Included                 |                          |                          | Section | Notes                                                          |
|------|----------------------------------------------------------------------------------------------------------------------------------------------------------------------------------------------------------------------------------------|--------------------------|--------------------------|--------------------------|---------|----------------------------------------------------------------|
|      |                                                                                                                                                                                                                                        | Y                        | N                        | NA                       |         |                                                                |
| 1.   | <b>Include "primary care" and/or discipline-specific terms in the title, abstract, and/or key words.</b>                                                                                                                               | <input type="checkbox"/> | <input type="checkbox"/> | <input type="checkbox"/> | I       |                                                                |
| 2.   | <b>Describe the study rationale and importance for primary care.</b>                                                                                                                                                                   | <input type="checkbox"/> | <input type="checkbox"/> | <input type="checkbox"/> | I       |                                                                |
| 2a.  | Explain the rationale for the research question and how it relates to primary care.                                                                                                                                                    | <input type="checkbox"/> | <input type="checkbox"/> | <input type="checkbox"/> | I       |                                                                |
| 2b.  | Describe the importance or relevance of the topic under study in the primary care setting.                                                                                                                                             | <input type="checkbox"/> | <input type="checkbox"/> | <input type="checkbox"/> | I       |                                                                |
| 2c.  | Identify any theory, model, or framework used, and explain why it is appropriate to the research question in primary care.                                                                                                             | <input type="checkbox"/> | <input type="checkbox"/> | <input type="checkbox"/> | I       |                                                                |
| 3.   | <b>Describe the research team's primary care experience and collaboration.</b>                                                                                                                                                         | <input type="checkbox"/> | <input type="checkbox"/> | <input type="checkbox"/> |         |                                                                |
| 3a.  | Describe the research team's expertise and experience in primary care practice and/or research.                                                                                                                                        | <input type="checkbox"/> | <input type="checkbox"/> | <input type="checkbox"/> | M       |                                                                |
| 3b.  | Describe whether and how primary care patients, practicing clinicians, community members, or other stakeholders were involved in the research process.                                                                                 | <input type="checkbox"/> | <input type="checkbox"/> | <input type="checkbox"/> | M       |                                                                |
| 4.   | <b>Describe the study participants and populations in the context of primary care.</b>                                                                                                                                                 | <input type="checkbox"/> | <input type="checkbox"/> | <input type="checkbox"/> |         |                                                                |
| 4a.  | Use person-focused language to refer to the research populations and participants, or use terms based on patient preferences.                                                                                                          | <input type="checkbox"/> | <input type="checkbox"/> | <input type="checkbox"/> | R       |                                                                |
| 4b.  | If reporting personal characteristics of participants, report the source of the data, the rationale for using it, and the rationale for any classifications used.                                                                      | <input type="checkbox"/> | <input type="checkbox"/> | <input type="checkbox"/> | R       |                                                                |
| 4c.  | Describe the participants and populations in sufficient detail to allow comparison to other primary care patient populations.                                                                                                          | <input type="checkbox"/> | <input type="checkbox"/> | <input type="checkbox"/> | R       |                                                                |
| 4d.  | Specify whether participants have preexisting therapeutic relationships with the clinical team or are new patients.                                                                                                                    | <input type="checkbox"/> | <input type="checkbox"/> | <input type="checkbox"/> | M, R    | Participants are healthcare professionals.                     |
| 5.   | <b>Describe the conditions under study in the context of primary care.</b>                                                                                                                                                             | <input type="checkbox"/> | <input type="checkbox"/> | <input type="checkbox"/> |         |                                                                |
| 5a.  | Describe whether the condition under study is acute or chronic.                                                                                                                                                                        | <input type="checkbox"/> | <input type="checkbox"/> | <input type="checkbox"/> | M, R    |                                                                |
| 5b.  | Report how multimorbidity is considered and how it might affect interpretation of the study findings/results.                                                                                                                          | <input type="checkbox"/> | <input type="checkbox"/> | <input type="checkbox"/> | M       |                                                                |
| 6.   | <b>Describe the clinical encounter under study in the context of primary care</b>                                                                                                                                                      | <input type="checkbox"/> | <input type="checkbox"/> | <input type="checkbox"/> |         |                                                                |
| 6a.  | Specify whether the study focus is an isolated clinical encounter or a longitudinal course of care. If it is an isolated clinical encounter, specify whether it is the first visit or a follow-up visit for the condition under study. | <input type="checkbox"/> | <input type="checkbox"/> | <input type="checkbox"/> | M       |                                                                |
| 7.   | <b>Describe the patient care team.</b>                                                                                                                                                                                                 | <input type="checkbox"/> | <input type="checkbox"/> | <input type="checkbox"/> |         |                                                                |
| 7a.  | If care is delivered by teams, describe the team members and their roles.                                                                                                                                                              | <input type="checkbox"/> | <input type="checkbox"/> | <input type="checkbox"/> | R       |                                                                |
| 7b.  | For each clinician category, report profession, specialty, and qualifications.                                                                                                                                                         | <input type="checkbox"/> | <input type="checkbox"/> | <input type="checkbox"/> | R       | Information is not relevant in this small-scale pilot project. |
| 8.   | <b>Describe the study interventions in the context of primary care.</b>                                                                                                                                                                | <input type="checkbox"/> | <input type="checkbox"/> | <input type="checkbox"/> |         |                                                                |
| 8a.  | Describe interventions and their implementation in sufficient detail to enable the reader to assess applicability in their own setting.                                                                                                | <input type="checkbox"/> | <input type="checkbox"/> | <input type="checkbox"/> | M       |                                                                |
| 8b.  | Describe any clustering or grouping of patients, participants, clinicians, teams, or practices, and how it was addressed in the analysis.                                                                                              | <input type="checkbox"/> | <input type="checkbox"/> | <input type="checkbox"/> | M, R    |                                                                |
| 8c.  | Describe the health care system in sufficient detail to allow comparisons to other systems.                                                                                                                                            | <input type="checkbox"/> | <input type="checkbox"/> | <input type="checkbox"/> | I, D    | No impact of system on intervention delivery                   |
| 9.   | <b>Describe study measures used and their relevance to primary care.</b>                                                                                                                                                               | <input type="checkbox"/> | <input type="checkbox"/> | <input type="checkbox"/> |         |                                                                |
| 9a.  | Report whether study measurement tools have been validated in primary care populations or settings.                                                                                                                                    | <input type="checkbox"/> | <input type="checkbox"/> | <input type="checkbox"/> | M       |                                                                |
| 9b.  | Describe how the measurement tools used are meaningful to primary care patients and their care.                                                                                                                                        | <input type="checkbox"/> | <input type="checkbox"/> | <input type="checkbox"/> | M       |                                                                |
| 9c.  | Report findings/results to be clinically interpretable by primary care clinicians and patients.                                                                                                                                        | <input type="checkbox"/> | <input type="checkbox"/> | <input type="checkbox"/> | R       |                                                                |
| 10.  | <b>Discuss the meaning of study findings/results in the context of primary care.</b>                                                                                                                                                   | <input type="checkbox"/> | <input type="checkbox"/> | <input type="checkbox"/> |         |                                                                |
| 10a. | Discuss implications of the study findings/results for research, patient care, education, and policy with specific focus on primary care.                                                                                              | <input type="checkbox"/> | <input type="checkbox"/> | <input type="checkbox"/> | D       |                                                                |
| 10b. | Discuss the implications of study recommendations on demands and priorities in primary care practice.                                                                                                                                  | <input type="checkbox"/> | <input type="checkbox"/> | <input type="checkbox"/> | D       |                                                                |
| 10c. | Comment on any research processes that might influence the applicability of the study findings/results in diverse primary care settings.                                                                                               | <input type="checkbox"/> | <input type="checkbox"/> | <input type="checkbox"/> | D       |                                                                |

Figure 1: CRISP reporting guideline.

CRISP = Consensus Reporting Items for Studies in Primary Care; D = discussion; I = introduction; M = methods; N = no; NA = not applicable, R = results; Y = yes.
